# Supplementary material for: Prediction of falls using a risk assessment tool in the acute care setting
Source: Springer Nature journal article supplement (doi:10.1186/1741-7015-2-1), 2004-01-21
Supplement: Additional file 1 [file 1741-7015-2-1-s1.doc]

**Appendix: Falls Risk Screening Tool and Sample Calculations**

|  | ITEM |  | **VALUE** | **SUB-SCORE** | |
| --- | --- | --- | --- | --- | --- |
| **1** | **History of Falls (HIST)** | Did the patient present to hospital with a fall or has s/he fallen on ward since admission?  If not, has the patient fallen within last 2 months? | Yes No    Yes No | Sub-score=1 if at least one ‘yes’ | |
| **22** | **Mental Status**  **(MNTL)** | Is the patient confused?  (*i.e. unable to make purposeful decisions, disorganized thinking, and memory impairment)*  Is the patient disoriented?  *(i.e. lacking awareness, being mistaken about time, place or person)*  Is the patient agitated?  *(i.e. fearful affect, frequent movements, and anxious)* | Yes No  Yes No  Yes No | Sub-score=1 if at least one ‘yes’ | |
| **3** | **Vision**  **(VISN)** | Does the patient require eyeglasses continuously?  Does the patient report blurred vision?  Does the patient have glaucoma, cataracts or macular degeneration? | Yes No  Yes No  Yes No | Sub-score=1 if at least one ‘yes’ | |
| **4** | **Toileting**  **(TOIL)** | Are there any alterations in urination?  *(i.e. frequency, urgency, incontinence, nocturia)* | Yes No | Sub-score=1 if at least one ‘yes’ | |
| **5** | **Transfer Score (TS)**  (transfer means from bed to chair and back) | 0= unable- no sitting balance; mechanical lift  1=major help (one strong skilled helper or two normal people; physical), can sit  2=minor help (one person easily or needs supervision for safety)  3=independent (use of aids to be independent is allowed) | 0  1  2  3 | Add TS+MS **(TSMS)**  Sub-score=1 if values total 0-3, | |
|  | **Mobility Score (MS)** | 0 = immobile  1=wheelchair independent including corners, etc  2= walks with help of one person (verbal or physical)  3= independent (but may use any aid, e.g., cane) | 0  1  2  3 | Sub-score=0 if values total 4-6 | |
| TOTAL SCORE | | | | | **/5** |

**i) Development of Weighted Risk Score Formula**

The relative magnitude of the regression coefficients from the multivariate logistic regression model suggested the following weighted risk score (R) formula:

**R** = 6*(HIST) + 14*(MNTL) + 1*(VISN) + 2*(TOIL) + 7*(TSMS)

The variables in the equation can be defined as HIST=history of falls, MNTL=mental status, VISN=vision, TOIL=toileting, and TSMS=transfer/mobility score. Each of these variables are given the value of ‘1’ if at least one item within the category is present, and ‘0’ if otherwise. Given that each risk factor was scored as ‘0’ or ‘1’, the weighted risk score (R) is simply the sum of the weights. Therefore R = 0 if no risk factors are present, and R=30 if all risk factors are present.

**ii) Sample Calculations**

**UNWEIGHTED SCORE:**

**STEP 1:SUB-SCORE:** For each of the first 4 items, sub-score is equal to ‘1’ if ‘yes’ is circled at least once in each item, ‘0’ if otherwise (i.e. ‘yes’ is not circled).

**STEP 2:** **TOTAL SCORE:** Add each sub-score for the 5 items to get a total score (min = 0, max = 5)

**WEIGHTED SCORE:**

**STEP 1:SUB-SCORE:** For each of the first four items, sub-score is equal to ‘1’ if ‘yes’ is circled at least once in each item, ‘0’ if otherwise (i.e. ‘yes’ is not circled).

**STEP 2**: **TOTAL SCORE**: For each item, 0 (no risk) or 1 (risk) is substituted in the equation: **R=6(HIST)+14(MNTL)+1(VISN)+2(TOIL)+7(TSMS)** (minimum =0, maximum=30).

**Interpretation of Total Score:** If score is >9, individual is classified ‘at risk’, <9, ‘no risk’.

**Sample Calculation:**

**Scenario for Patient A**:

History of Falls- Patient A reports that they fell in the last month. There are no incident reports of falling during the hospital admission.

Mental Status – Patient A appears to be confused and disoriented, but is not visibly agitated.

Vision – Patient A wears glasses regularly. There is no documented report of blurred vision, glaucoma, cataracts or macular degeneration.

Toileting – Patient A has no alterations in urination while in hospital.

Transfer Score – Patient A is independent and does not use aids for transferring.

Mobility Score – Patient A is independent in walking and getting around, however sometimes uses a cane.

**Calculation of Weighted Risk Score for Patient A:**

History of Falls – Sub-score = 1

Mental Status – Sub-score = 1

Vision – Sub-score = 1

Toileting – Sub-score = 0

Transfer Score + Mobility Score – 3 + 3 = 6, therefore sub-score = 0

Note that with items mental status and vision, even though more than one risk factor was present within these categories, a maximum sub-score of 1 was allotted for each item only.

Substituting these values into the equation: R = 6(1) + 14(1) + 1(1) + 2(0) + 7(0)

Thus, the weighted risk score **(R)** for patient A is: **21,** thus patient is ‘at risk for falls’.
